# Supplementary material
Source: Springer Nature journal article supplement (https://www.springermedizin.de/resource/supplementary/12958_2013_1201_MOESM2_ESM.pdf/9567028)

**Fecal glucocorticoid metabolites  
(ng/g feces)**

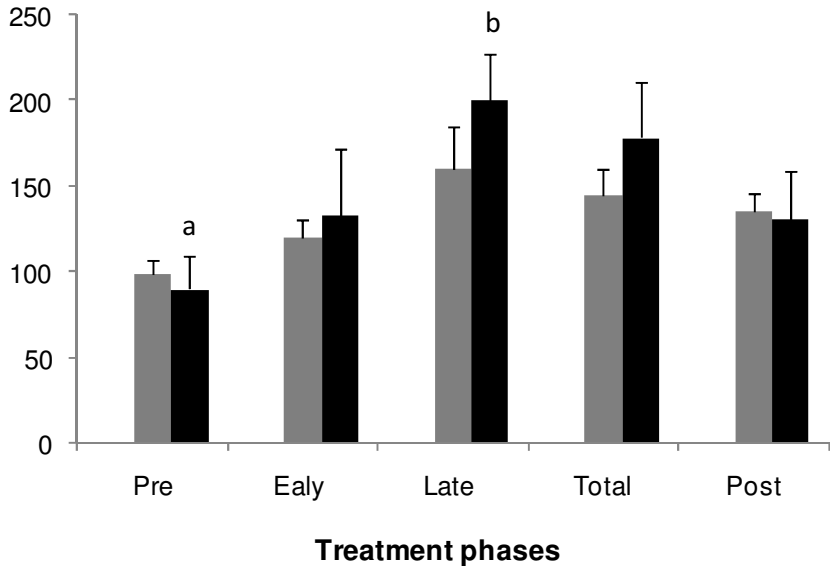

Supplement: MOESM2 [file 9567028]
